# Supplementary material for: A simple and low-cost fully 3D-printed non-planar emulsion generator
Source: Royal Society of Chemistry journal article supplement (doi:10.1039/c5ra23129a), 2015-12-24
Supplement: c5ra23129a1.pdf [file c5ra23129a1.pdf]

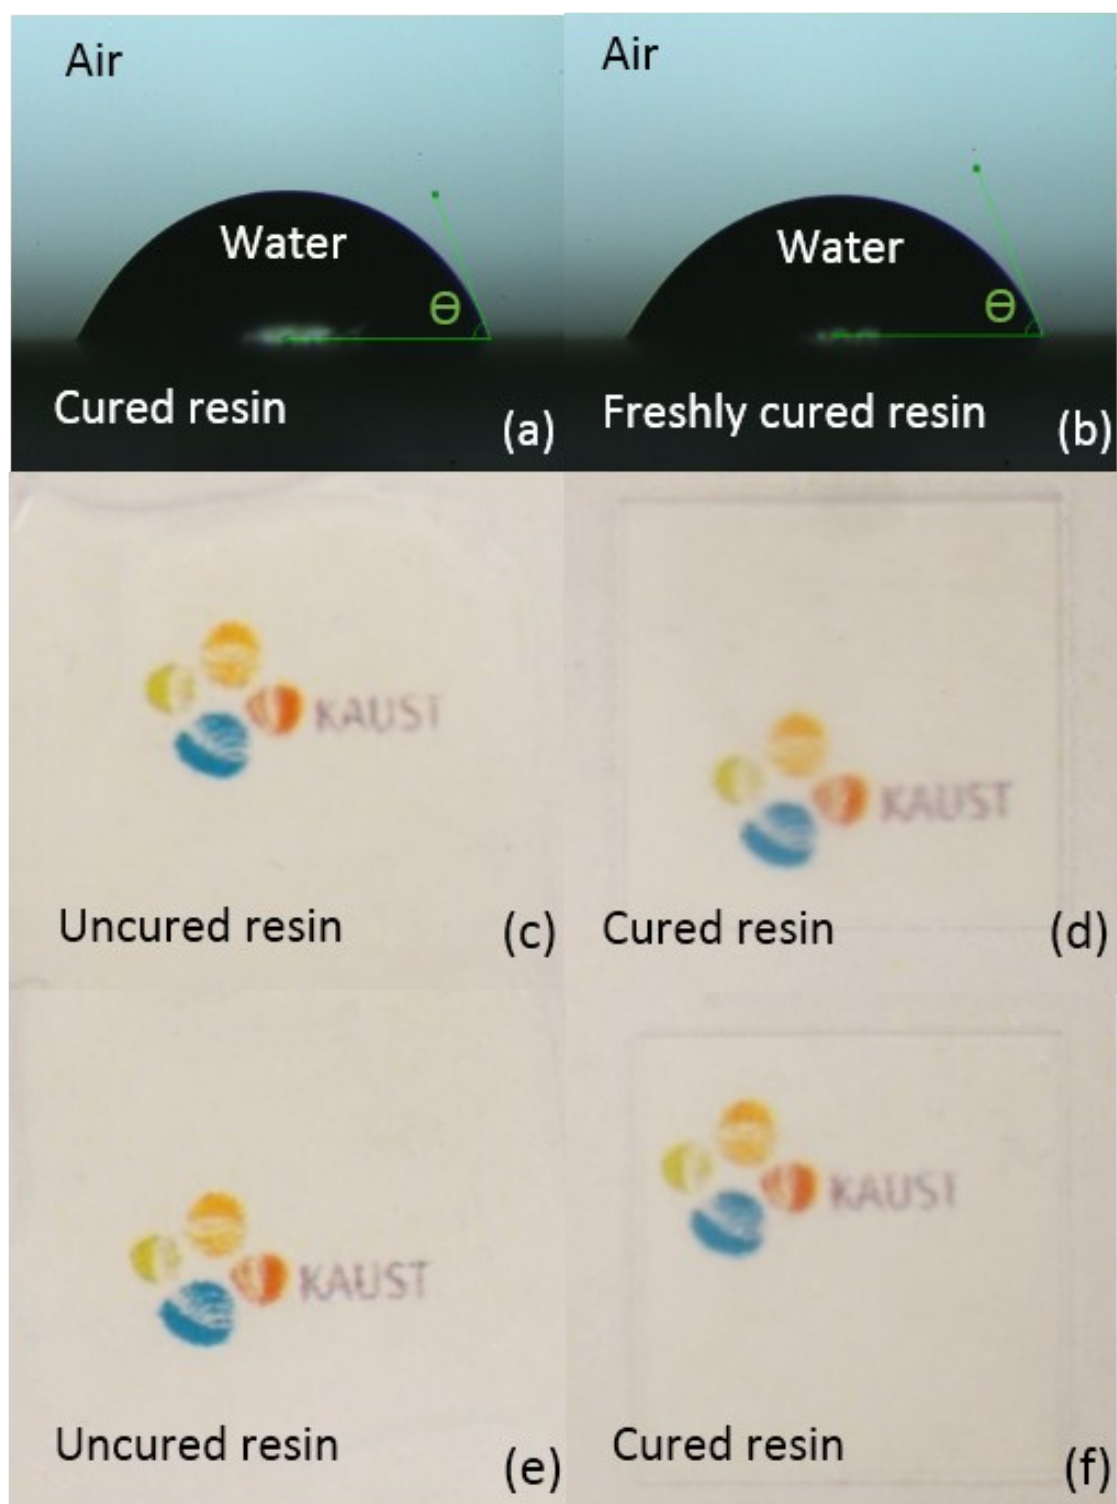

Fig. S1 Contact angle of DI water on the resin (a) cured half a year ago,  $\theta \sim 69^\circ$  and (b) freshly cured,  $\theta \sim 68^\circ$ . Transparency test on different resins: (c) and (d) fresh resins. and (e) and (f) resins stored half a year ago. No aging effects are noticed.
